# Supplementary material for: HER2-Displaying M13 Bacteriophages induce Therapeutic Immunity against Breast Cancer
Source: MDPI journal article supplement (doi:10.3390/cancers14164054), 2022-08-22
Supplement: s1 [file s1]

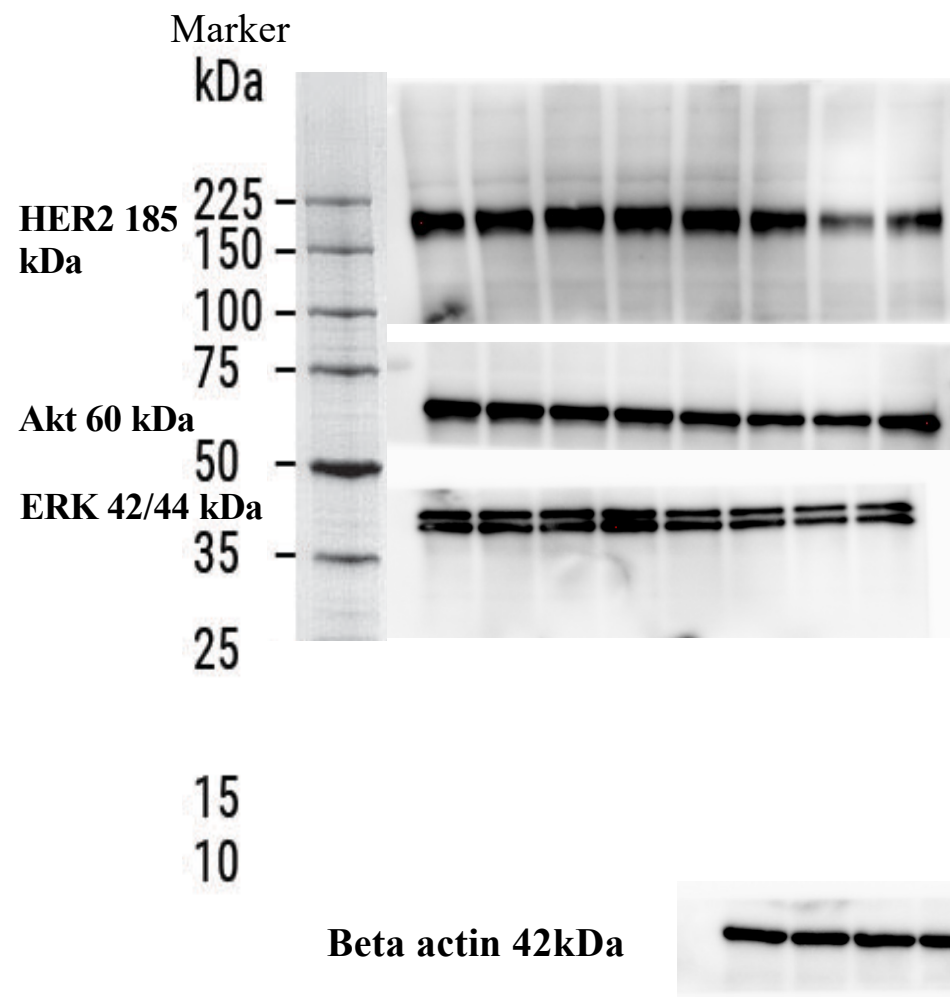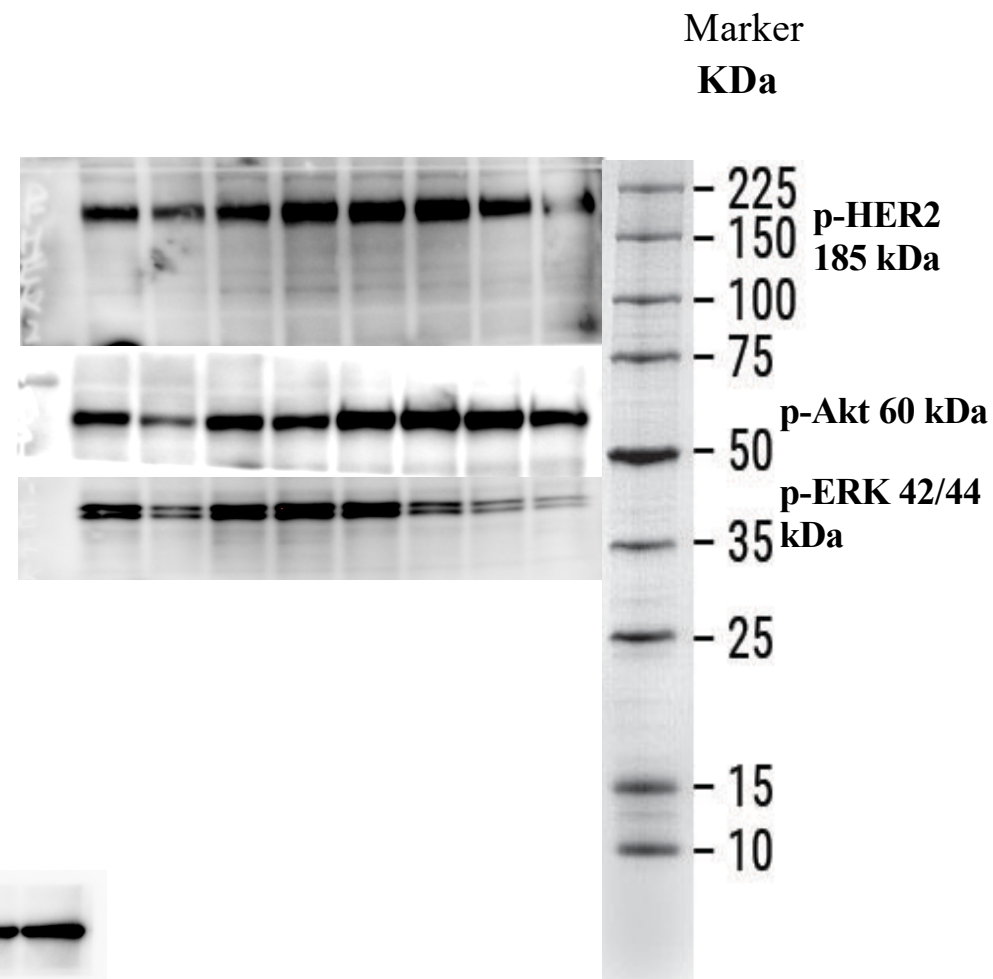

Original western blots from which Figure 6 (Panel A) derived:  
analysis of the expression levels of HER2, pHER2, Akt, pAkt, ERK, pERK and  $\beta$ -actin in trastuzumab sensitive BT-474 cells,  
treated or not with trastuzumab or control-IgG or immune-IgG for 8 hours.

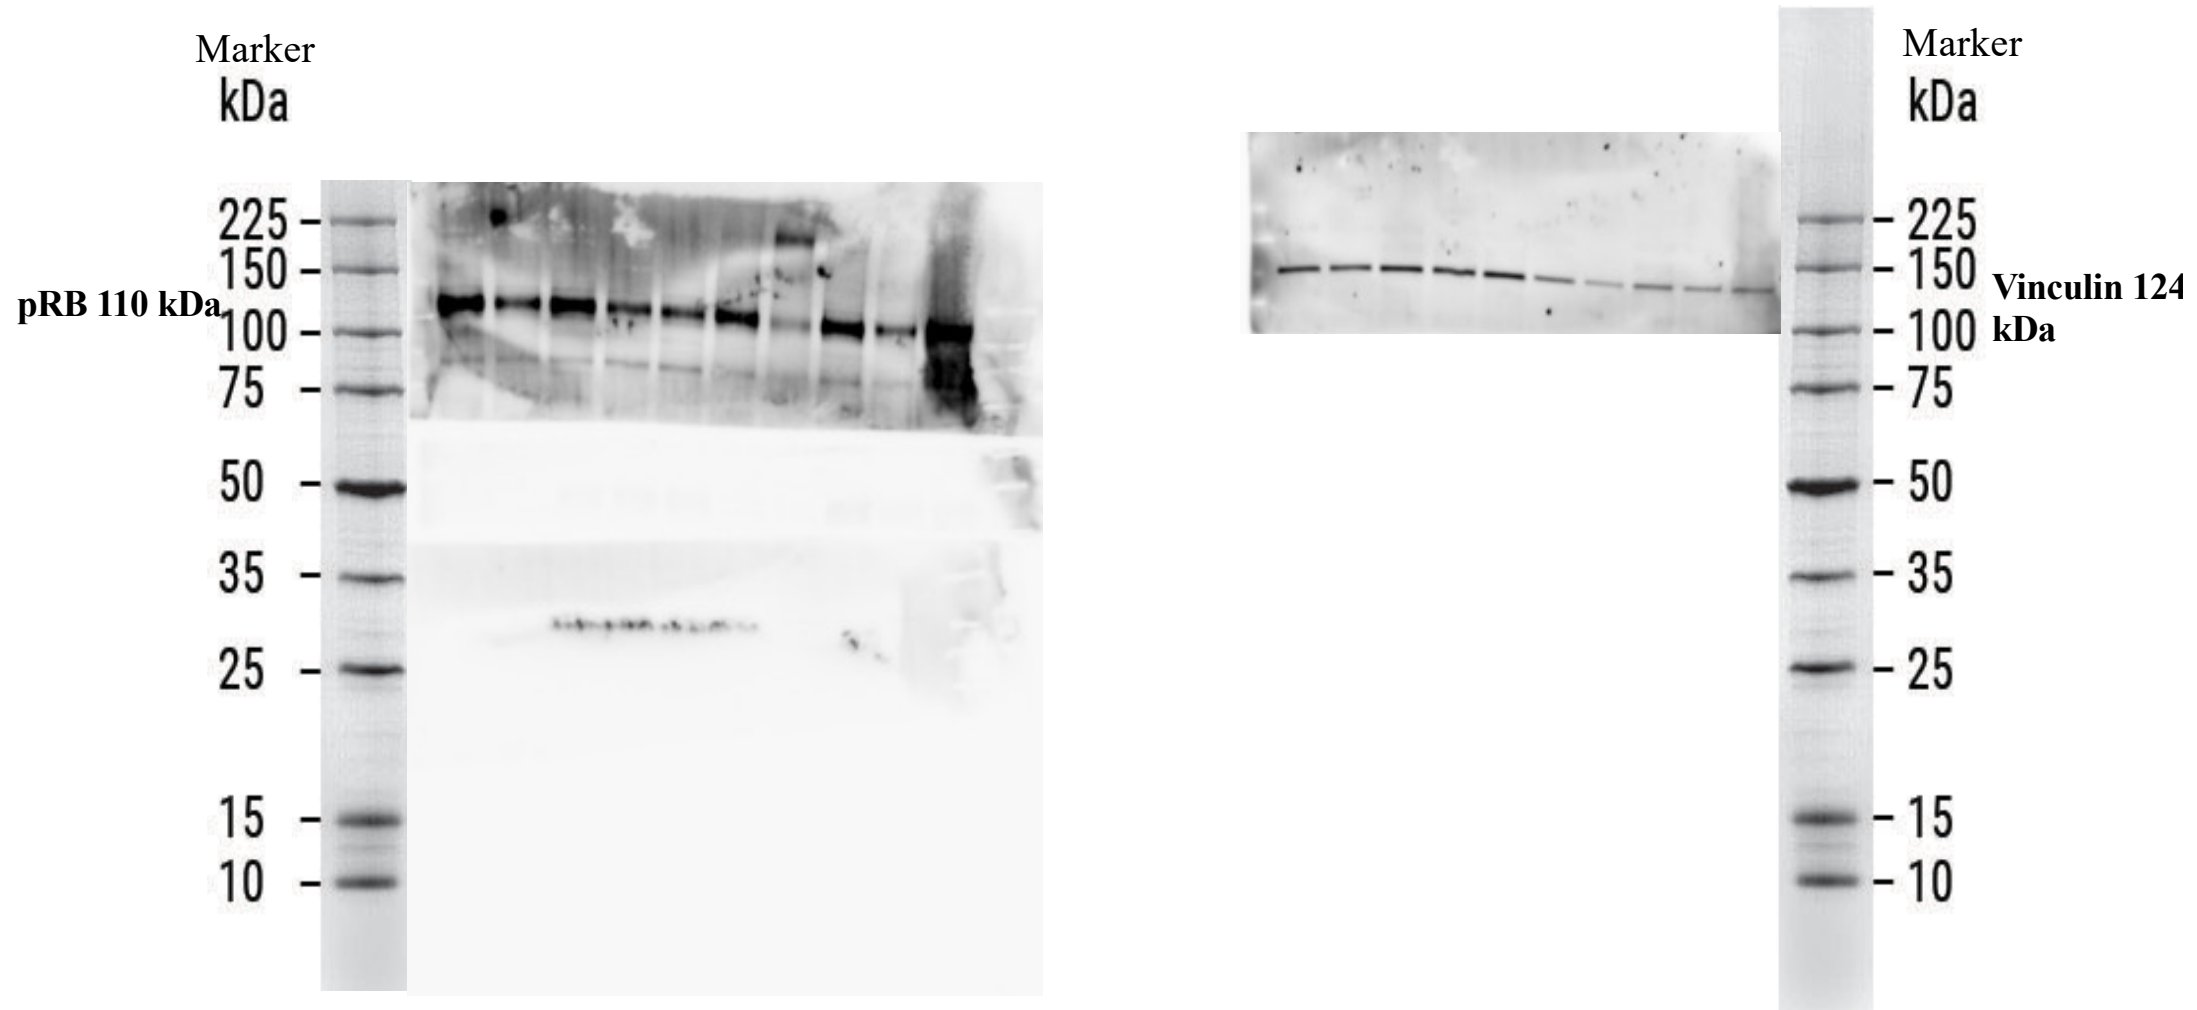

Original western blots from which Figure 6 (Panel C) derived:  
analysis of the expression levels of pRB and vinculin in trastuzumab sensitive BT-474 cells, treated or not with  
trastuzumab or control-IgG or immune-IgG for 8 hours (lanes 1-5: samples shown in the Figure 6).

|                                       | HER2/ $\beta$ -actin | ERK/ $\beta$ -actin | pERK/ERK    | pAKT/AKT    | pRB/Vinculin |
|---------------------------------------|----------------------|---------------------|-------------|-------------|--------------|
| Ctrl                                  | 1.1619352            | 1.136381032         | 0.90888449  | 0.785939356 | 5.136666667  |
| Trastuzumab<br>15 $\mu$ g/ml          | 0.998749912          | 1.231663141         | 0.553886772 | 0.595614235 | 3.783333333  |
| IgG empty 15 $\mu$ g/ml               | 1.220824649          | 1.254265141         | 0.959528715 | 0.99745692  | -            |
| IgG empty 30<br>$\mu$ g/ml            | 1.366925333          | 1.383872968         | 1.035681769 | 0.896702614 | 4.786666667  |
| IgG ECTM<br>15 $\mu$ g/ml             | 1.258655056          | 1.090137162         | 1.082599443 | 1.005735603 | -            |
| IgG ECTM 30<br>$\mu$ g/ml             | 0.953788042          | 0.812949194         | 0.775646206 | 1.370403968 | 3.089080289  |
| IgG $\Delta$ 16 ECTM<br>15 $\mu$ g/ml | 0.447996027          | 0.686202358         | 0.587672756 | 1.269266502 | -            |
| IgG $\Delta$ 16 ECTM<br>30 $\mu$ g/ml | 0.791426762          | 0.78987637          | 0.252087391 | 0.707616232 | 2.283049442  |

**Corresponding to Figure 6. Densitometry Readings/intensity Ratio**

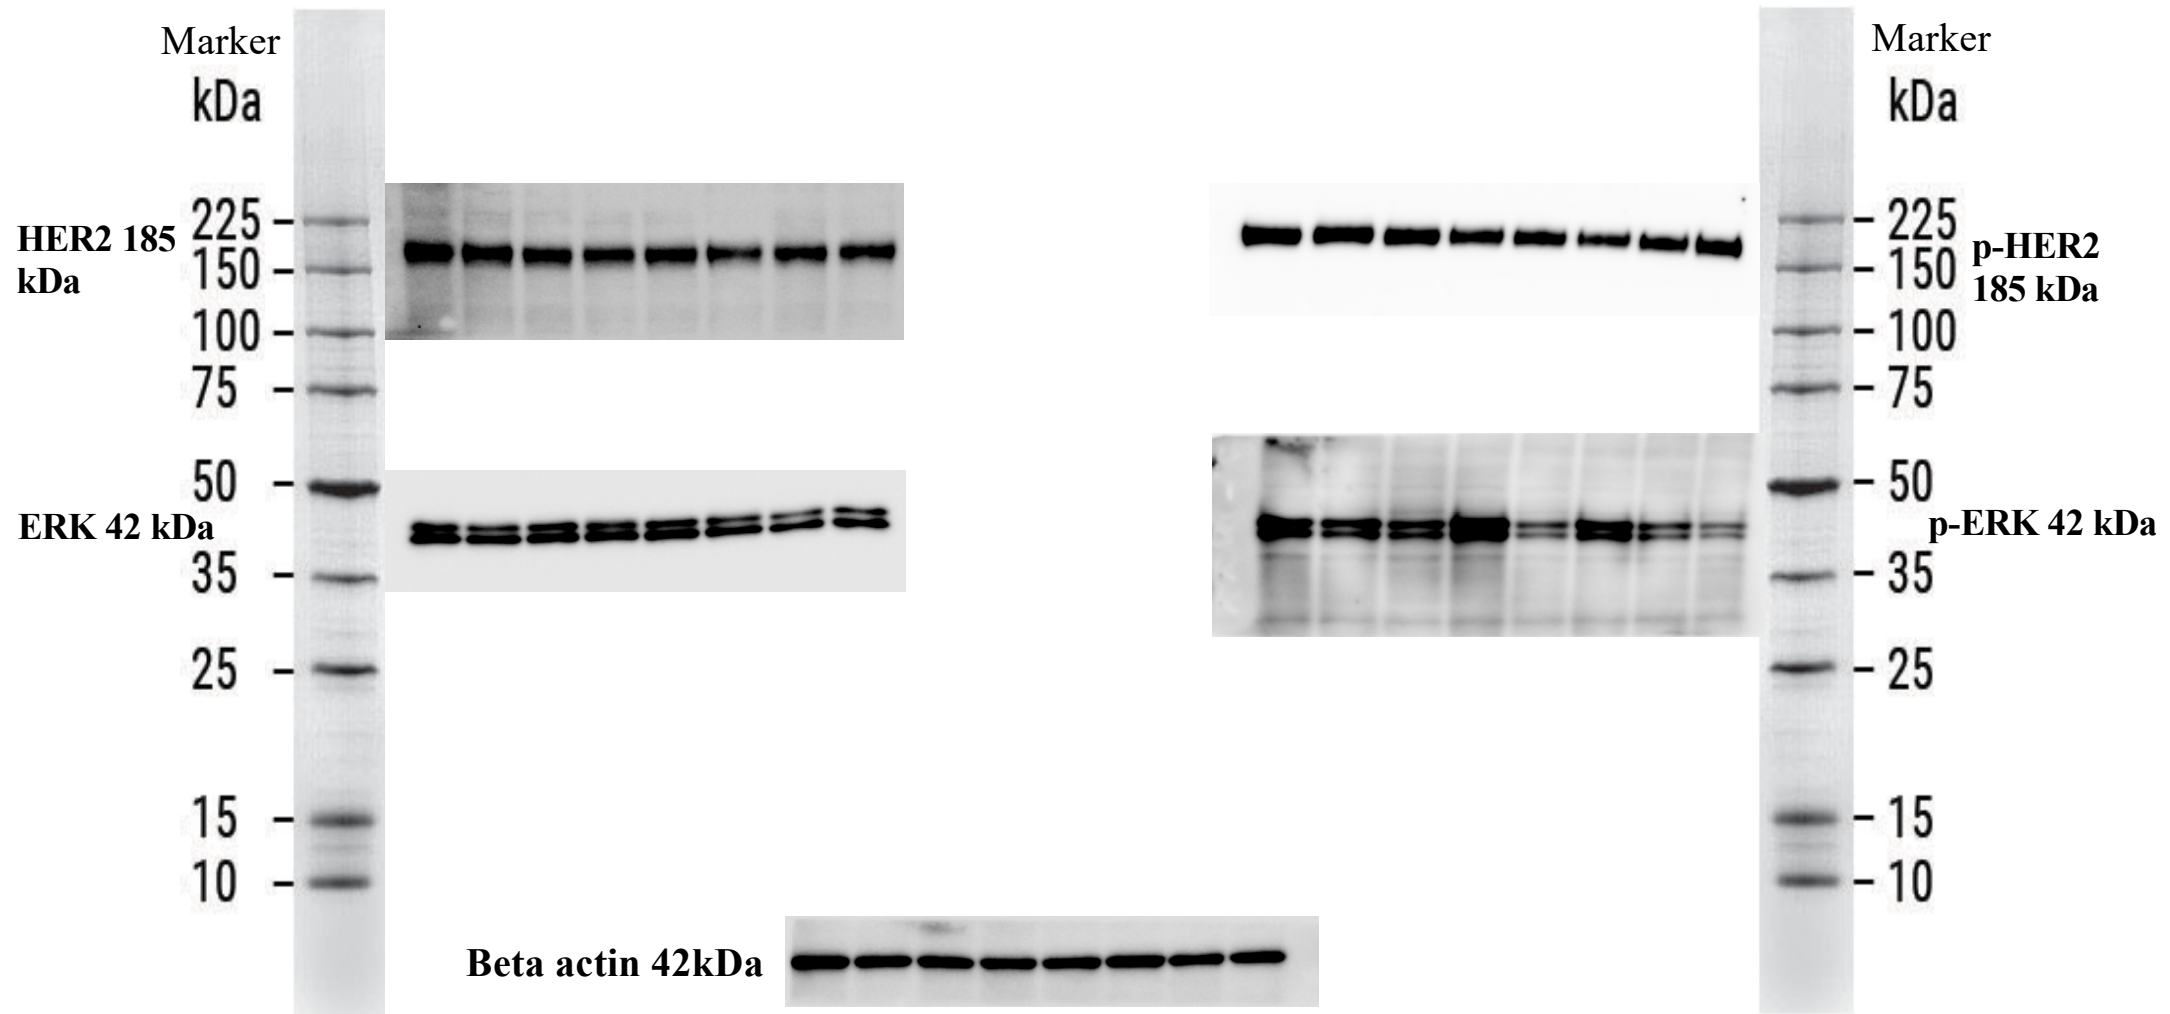

Original western blots from which Figure 8 (Panel A) derived:  
 analysis of the expression levels of HER2, pHER2, ERK, pERK and  $\beta$ -actin in trastuzumab-resistant BT-474 cells,  
 treated or not with trastuzumab or control-IgG or immune-IgG for 8 hours.

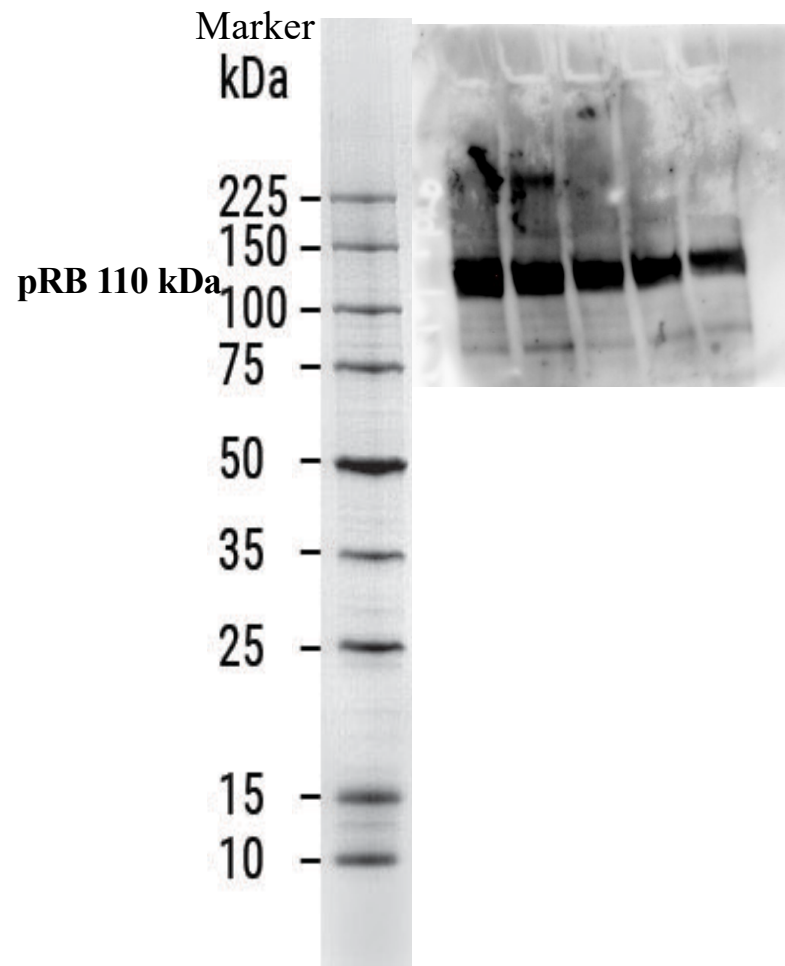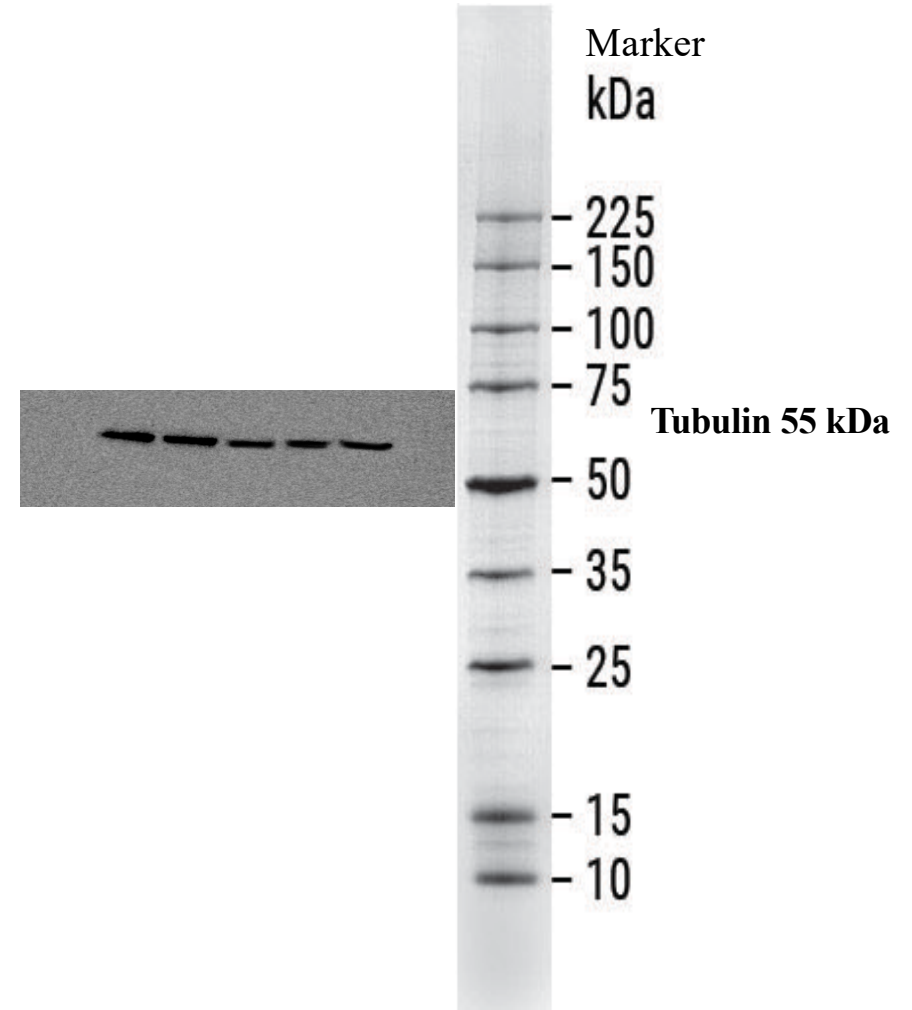

Original western blots from which Figure 8 (Panel C) derived:  
analysis of the expression levels of pRB and tubulin in trastuzumab-resistant BT-474 cells, treated or not with  
trastuzumab or control-IgG or immune-IgG for 8 hours.

|                                   | HER2/ $\beta$ -actin | pERK/ERK    | pRB/Tubulin |
|-----------------------------------|----------------------|-------------|-------------|
| Ctrl                              | 1.679347806          | 0.992637579 | 2.357112043 |
| Trastuzumab 15 $\mu$ g/ml         | 1.362055286          | 0.842840569 | 2.467402383 |
| IgG empty 15 $\mu$ g/ml           | 1.285960556          | 0.92065526  | -           |
| IgG empty 30 $\mu$ g/ml           | 1.297641049          | 1.140823538 | 2.284822489 |
| IgG ECTM 15 $\mu$ g/ml            | 1.391300748          | 0.421953155 | -           |
| IgG ECTM 30 $\mu$ g/ml            | 0.874594002          | 0.743851765 | 1.702650828 |
| IgG $\Delta$ 16ECTM 15 $\mu$ g/ml | 1.103172855          | 0.677053478 | -           |
| IgG $\Delta$ 16ECTM 30 $\mu$ g/ml | 1.055927991          | 0.361036895 | 1.748787398 |

**Corresponding to Figure 8. Densitometry Readings/intensity Ratio**

|                        | BT474  |        |        |        | BT474.R |        |        |        | BT474  |        |        |        | BT474.R |        |        |        |                        |
|------------------------|--------|--------|--------|--------|---------|--------|--------|--------|--------|--------|--------|--------|---------|--------|--------|--------|------------------------|
| Trastuzumab<br>15µg/ml | -      | +      | +      | +      | -       | +      | +      | +      | -      | +      | +      | +      | -       | +      | +      | +      | Trastuzumab<br>15µg/ml |
| hours                  | 0      | 2      | 8      | 48     | 0       | 2      | 8      | 48     | 0      | 2      | 8      | 48     | 0       | 2      | 8      | 48     | hours                  |
| HER2/β-actin           | 1.9649 | 1.9889 | 1.9772 | 2.1012 | 2.4800  | 2.4965 | 2.5009 | 2.3058 | 1.5965 | 1.4962 | 1.5098 | 1.2336 | 1.7928  | 1.7502 | 1.9196 | 1.7494 | p-HER2/β-actin         |
| AKT/β-actin            | 1.8719 | 1.6495 | 2.2231 | 2.3161 | 1.4670  | 1.4061 | 1.7446 | 2.3741 | 2.3843 | 1.5298 | 1.7211 | 1.5484 | 2.0931  | 2.1374 | 1.9948 | 1.7650 | p-AKT/β-actin          |
| Erk/β-actin            | 1.4184 | 1.3791 | 1.5745 | 1.5142 | 1.2378  | 1.2746 | 1.2001 | 1.3234 | 2.1867 | 1.8896 | 1.3917 | 1.0561 | 1.5239  | 2.3692 | 2.1691 | 2.3872 | p-Erk/β-actin          |

**Corresponding to Supplementary Figure S4. Densitometry Readings/intensity Ratio**
